# Supplementary material for: Phospholipid scramblase 1 (PLSCR1) regulates interferon-lambda receptor 1 (IFN-λR1) and IFN-λ signaling in influenza A virus (IAV) infection
Source: eLife journal article supplement (doi:10.7554/elife.104359), 2025-03-11
Supplement: fig4-data1 [file Figure 4, Source Data 1.pdf › Figure 4, Source Data 1/Figure 4, Source Data 1.pdf]

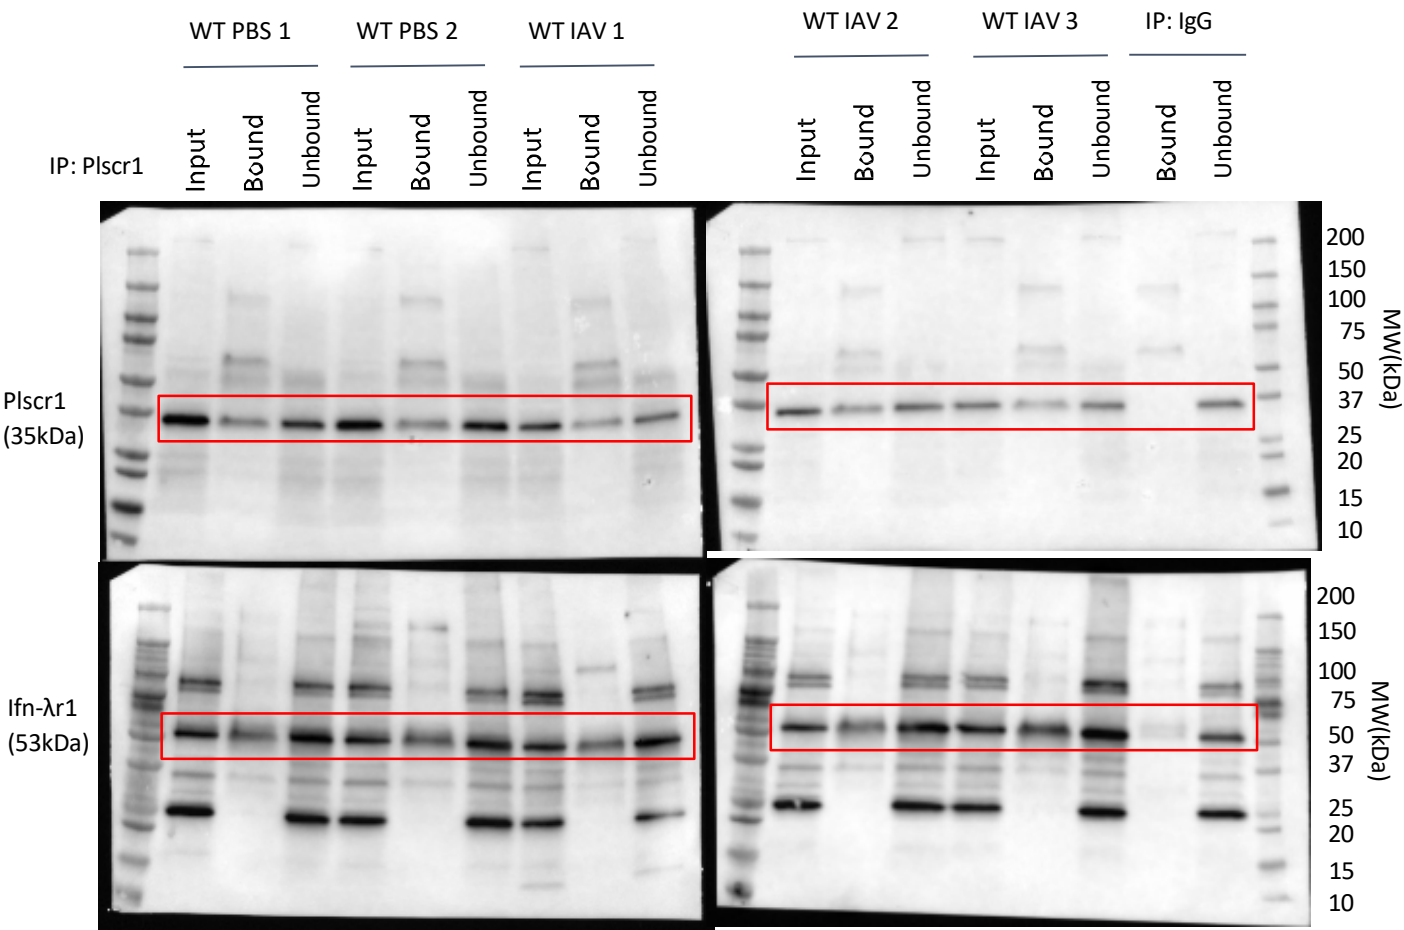

**Figure 4, Source Data 1.** Original gel corresponding to Figure 4, panel A. The exposure time was adjusted to visualize Plscr1 (top) or Ifn-λr1 (bottom).
