# Supplementary material for: Phospholipid scramblase 1 (PLSCR1) regulates interferon-lambda receptor 1 (IFN-λR1) and IFN-λ signaling in influenza A virus (IAV) infection
Source: eLife journal article supplement (doi:10.7554/elife.104359), 2025-03-11
Supplement: fig8-data1 [file Figure 8, Source Data 1.pdf › Figure 8, Source Data 1/Figure 8, Source Data 1.pdf]

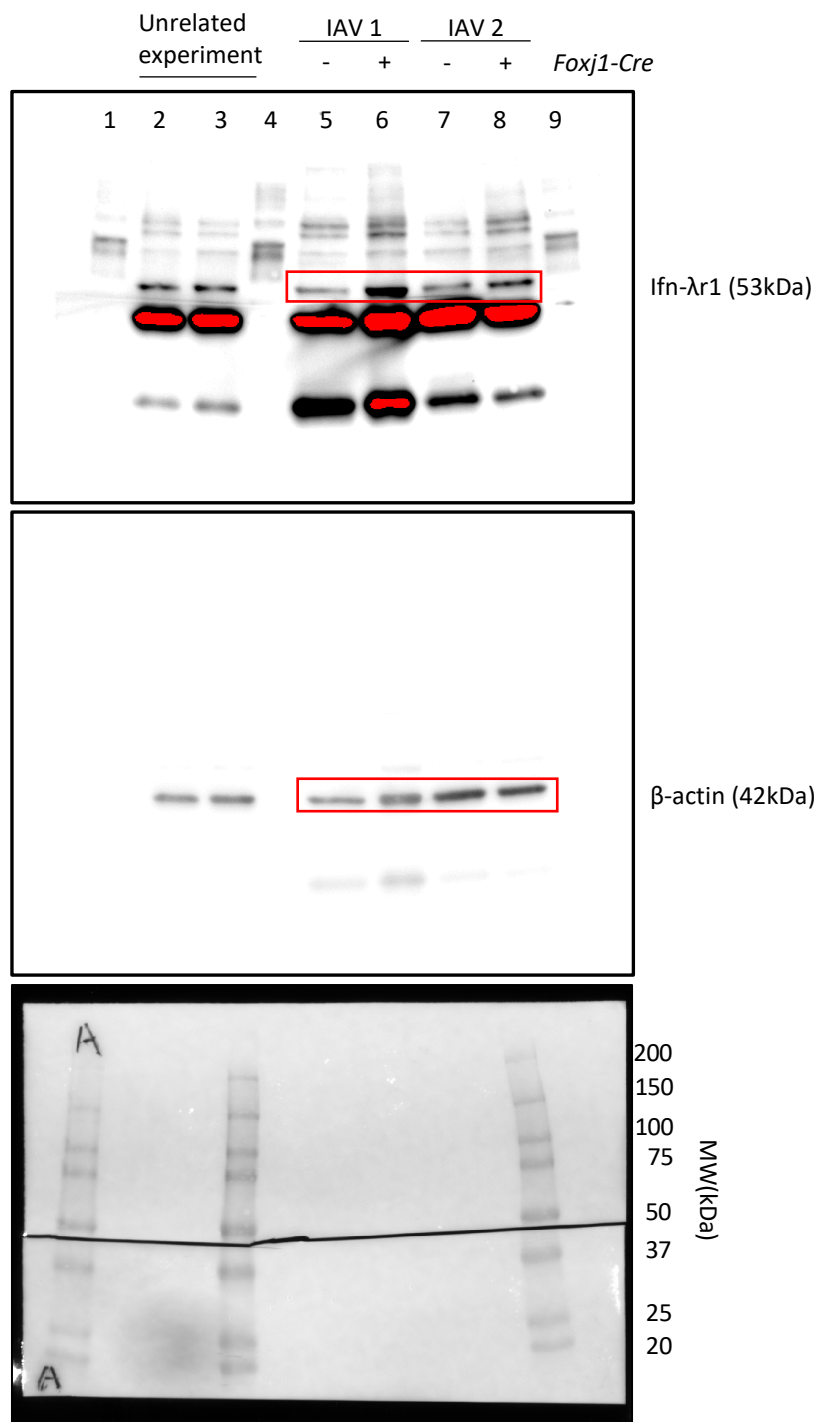

**Figure 8, Source Data 1.** Original membrane corresponding to Figure 8, panel I. The membrane was cut just under 50 kDa marker after transfer. The top part was incubated with  $\alpha$ -Ifn- $\lambda$ r1 antibody and the bottom part was incubated with  $\alpha$ - $\beta$ -actin antibody. They were then incubated with corresponding secondary antibodies separately. The exposure time was adjusted to visualize Ifn- $\lambda$ r1 (top) or  $\beta$ -actin (middle). Colorimetric photo was taken to visualize the molecular weight markers (bottom). Lane 2 and 3 were from an unrelated experiment.
