# Supplementary figures and images for: Phospholipid scramblase 1 (PLSCR1) regulates interferon-lambda receptor 1 (IFN-λR1) and IFN-λ signaling in influenza A virus (IAV) infection
Source: eLife journal article supplement (doi:10.7554/elife.104359), 2025-03-11

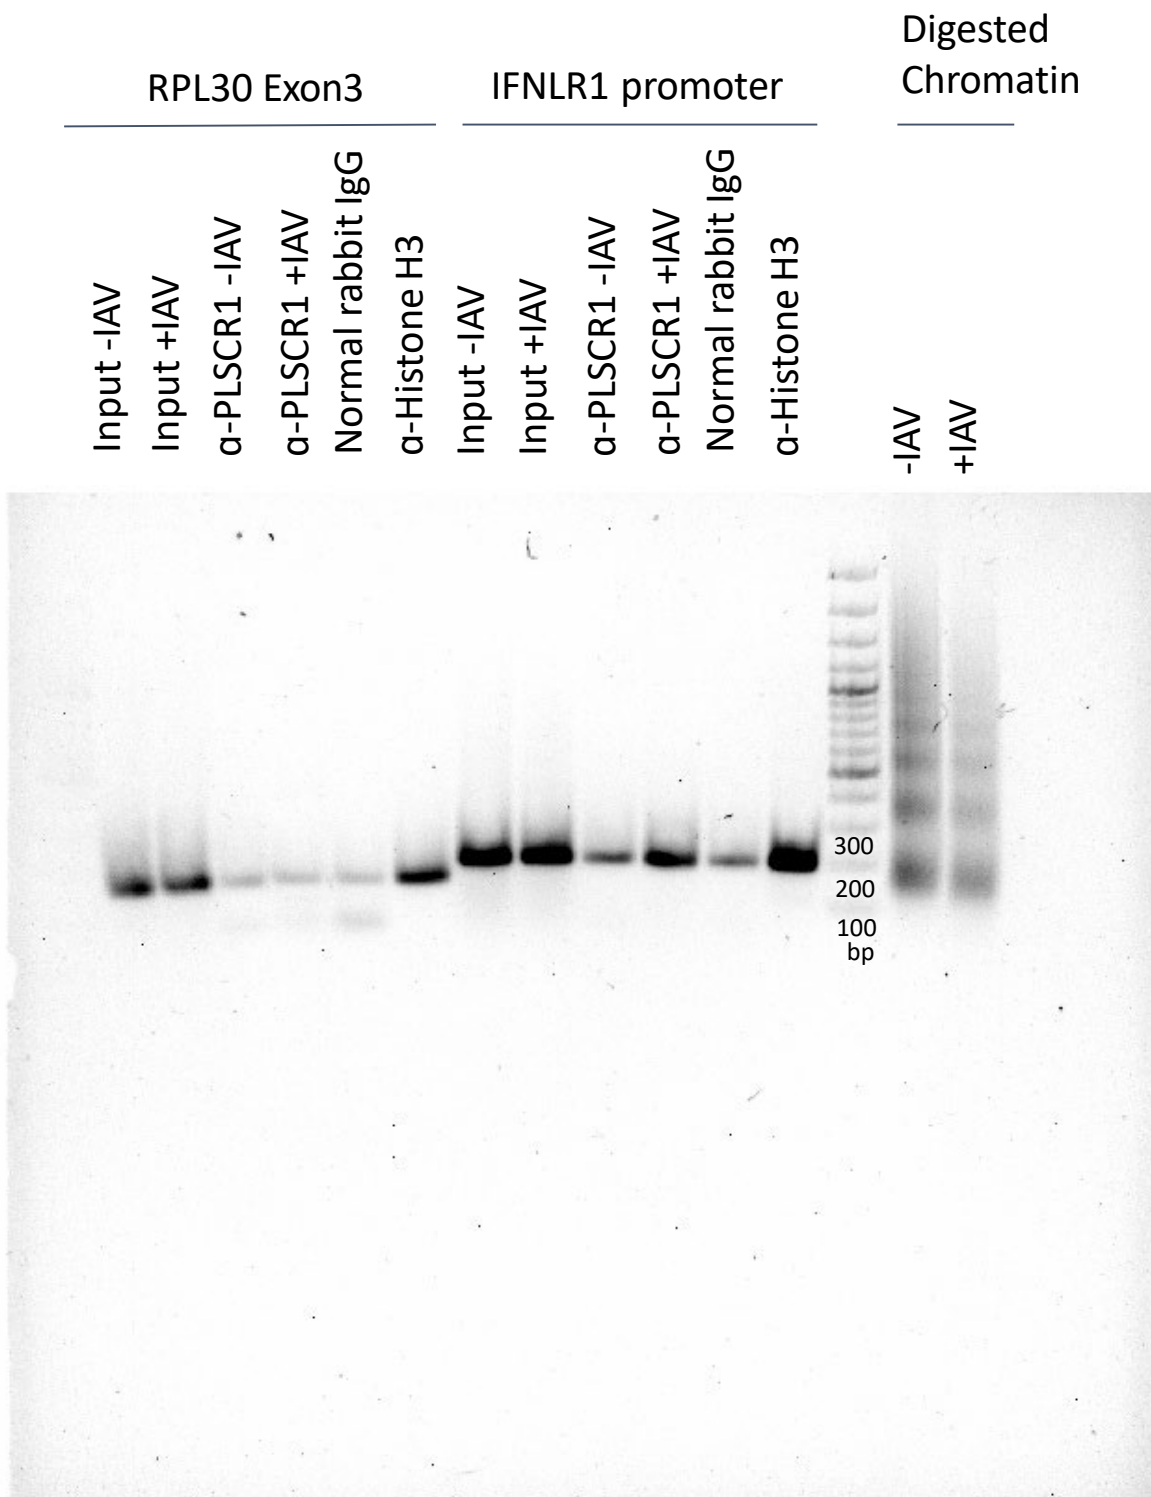

**Figure 3, Source Data 1.** Original gel corresponding to Figure 3, panel H.

Supplement: fig3-data1 [file Figure 3, Source Data 1.pdf › Figure 3, Source Data 1/Figure 3, Source Data 1.pdf]
